# Supplementary material for: Experimental and quantum chemical study of photochemical properties of 4-hydroxyquinoline
Source: Royal Society of Chemistry journal article supplement (doi:10.1039/b9pp00017h), 2009-09-04
Supplement: b9pp00017h.pdf [file b9pp00017h.pdf]

## Supplementary Materials

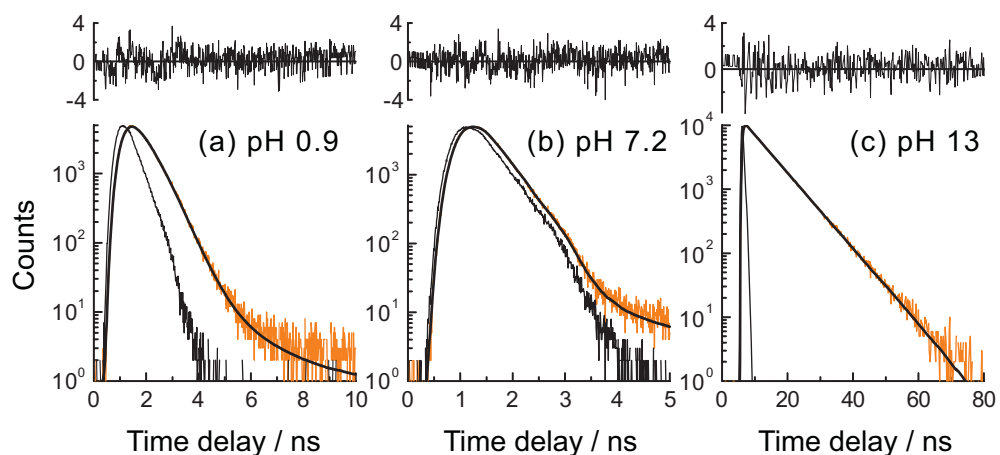

Figure A. Fluorescence time profiles recorded after excitation of 4HQ at 320 nm in acidic (pH 0.9), neutral (pH 7.2), and basic (pH 13) aqueous solutions. Orange line – observed signal, black line – instrument response function (IRF), smooth black line – convolution of biexponential function and IRF. Residuals are depicted in the insets above.

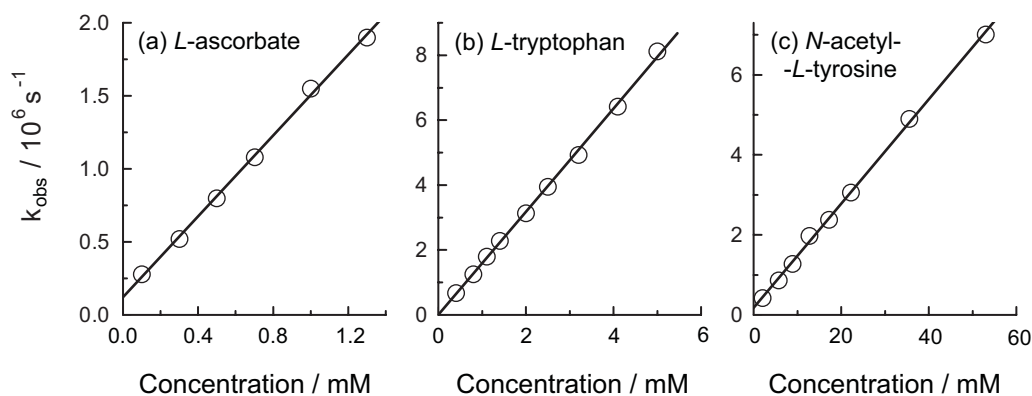

Figure B. The dependencies of the observed pseudo-first order rate constants of  $^T4\text{HQ}$  quenching on the quencher concentration.
